# Supplementary material
Source: PubMed Central journal article supplement (PMC11061853)
Supplement: ADB-29-e13388-s001.pdf [file ADB-29-e13388-s001.pdf]

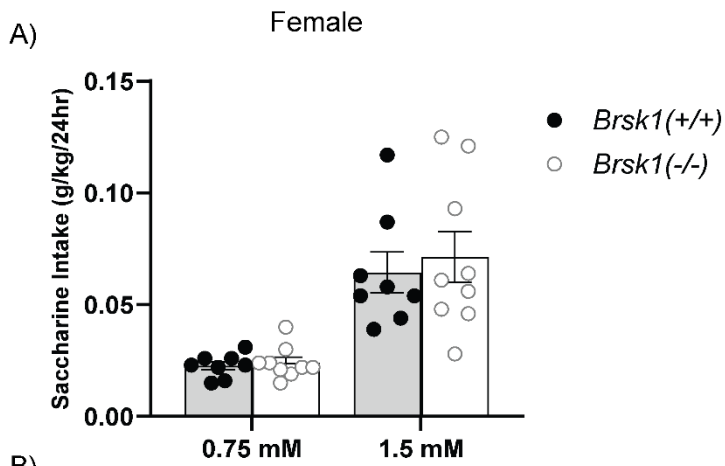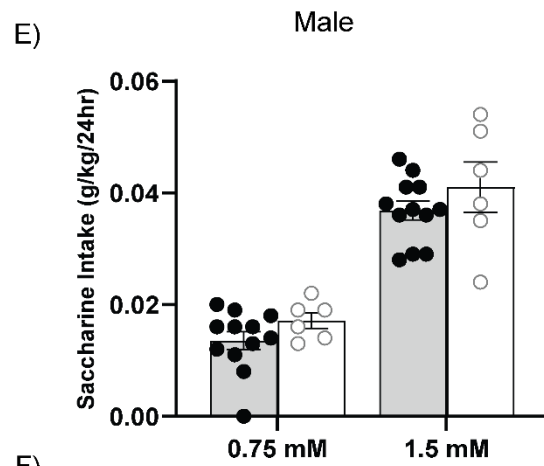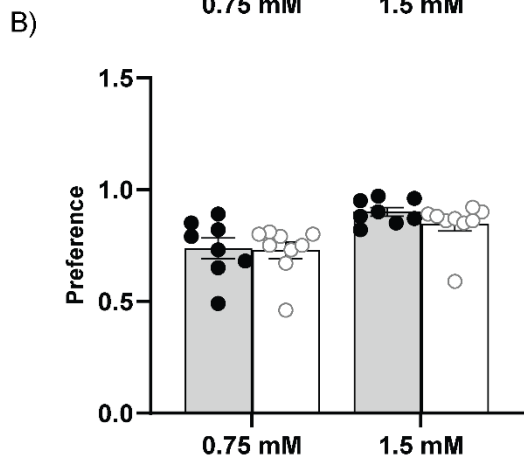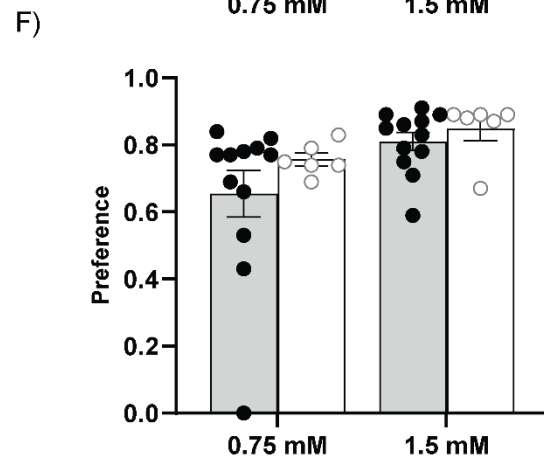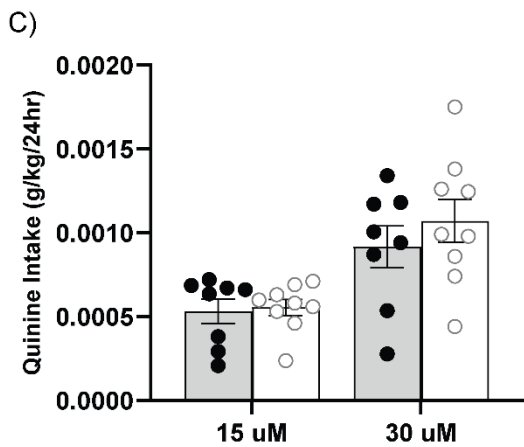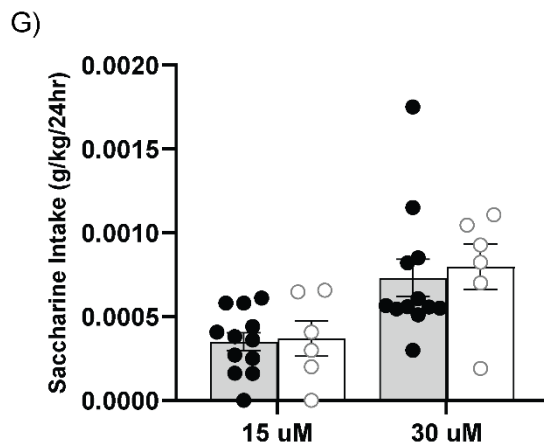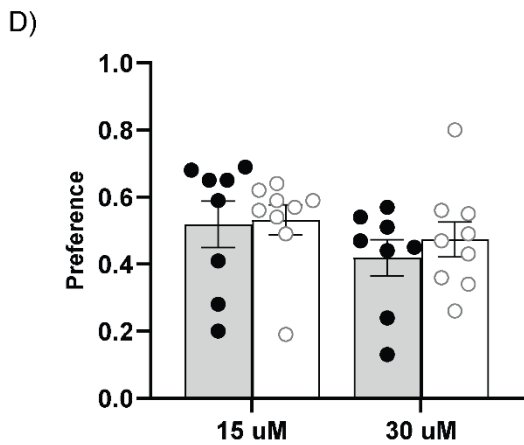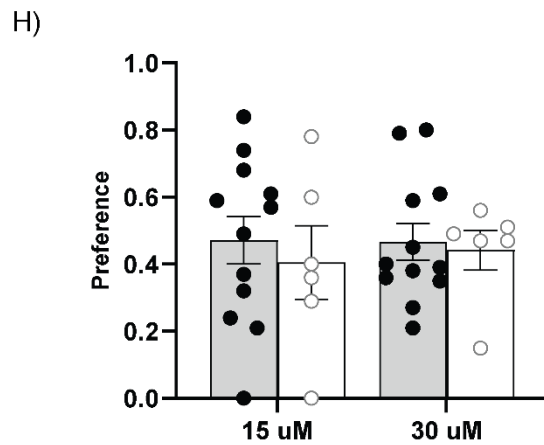

**Figure S1 – Saccharin and quinine consumption and preference in *Brsk1*<sup>-/-</sup> mice.**

**A)** Saccharin consumption and **B)** preference in female *Brsk1*<sup>-/-</sup> mice (n = 9) and wild-type (n = 8) littermates. **C)** Quinine consumption and **D)** preference in female *Brsk1*<sup>-/-</sup> mice and wild-type littermates. **E)** Saccharin consumption and **F)** preference in male *Brsk1*<sup>-/-</sup> mice (n = 6) and wild-type (n = 12) littermates. **G)** Quinine consumption and **H)** preference in male *Brsk1*<sup>-/-</sup> mice and wild-type littermates.
